# Supplementary material for: Clone wars: asexual reproduction dominates in the invasive range of Tubastraea spp. (Anthozoa: Scleractinia) in the South-Atlantic Ocean
Source: PeerJ. 2017 Oct 5;5:e3873. doi: 10.7717/peerj.3873 (PMC5632532; doi:10.7717/peerj.3873)
Supplement: File S2 — Raw data used in the present work, including allele sizes for each genotyped individual. [file peerj-05-3873-s002.xlsx]

## Sheet: T_coccinea
Species: Tubastraea coccinea
Individual	Population	Microsatellite loci
		Tco1		Tco4		Tco5		Tco8		Tco9		Tco29		Tco30		Tco34		Tco37		Tco36		Tco38
		Allele 1	Allele 2	Allele 1	Allele 2	Allele 1	Allele 2	Allele 1	Allele 2	Allele 1	Allele 2	Allele 1	Allele 2	Allele 1	Allele 2	Allele 1	Allele 2	Allele 1	Allele 2	Allele 1	Allele 2	Allele 1	Allele 2
BTS104	TSB	573	573	253	259	432	432	343	349	357	357	216	222	252	264	189	189	260	263	238	238	235	235
BTS105	TSB	567	573	253	259	380	440	343	349	347	347	213	222	252	256	186	189	260	263	238	238	227	227
BTS106	TSB	567	600	253	259	0	0	343	349	347	351	222	222	252	256	189	189	242	245	250	250	227	227
BTS107	TSB	567	573	253	259	380	440	343	349	347	347	213	222	252	256	186	189	260	263	238	238	227	227
BTS108	TSB	567	600	253	259	368	368	0	0	347	351	222	222	252	256	189	189	242	245	250	250	227	227
BTS109	TSB	567	573	253	259	380	440	343	349	347	347	213	222	252	256	186	189	260	263	238	238	227	227
BTS110	TSB	573	573	253	259	0	0	343	349	357	357	216	222	252	264	189	189	260	263	238	238	227	235
BTS111	TSB	567	573	253	259	384	440	343	349	0	0	213	222	252	256	186	189	260	263	238	238	227	227
BTS112	TSB	567	573	253	259	0	0	343	349	347	347	213	222	252	256	186	189	260	263	238	238	227	227
BTS113	TSB	573	573	253	259	432	432	343	349	357	357	216	222	252	264	189	189	260	263	238	238	235	235
BTS114	TSB	567	573	253	259	380	440	343	349	347	347	213	222	252	256	186	189	260	263	238	238	227	227
BTS115	TSB	567	573	253	259	380	440	0	0	347	347	213	222	252	256	186	189	242	245	238	238	227	227
BTS116	TSB	573	573	253	259	432	432	343	349	357	357	216	222	252	264	189	189	260	263	238	238	235	235
BTS117	TSB	567	600	253	259	368	380	343	349	347	351	222	222	252	256	189	189	242	245	250	250	227	227
BTS118	TSB	567	600	253	259	368	368	343	349	347	351	0	0	252	256	189	189	242	245	250	250	227	227
BTS119	TSB	567	573	253	259	380	440	343	349	347	347	0	0	252	256	186	189	260	263	238	238	227	227
BTS120	TSB	567	600	253	259	368	368	343	349	347	351	0	0	252	256	189	189	242	245	250	250	227	227
BTS121	TSB	567	600	253	259	368	380	343	349	347	351	222	222	252	256	189	189	242	245	250	250	227	227
BTS122	TSB	567	573	253	259	380	440	343	349	347	347	0	0	252	256	186	189	260	263	238	238	227	227
BTS123	TSB	567	600	253	259	368	368	343	349	347	351	0	0	252	256	189	189	242	245	250	250	227	227
BTS124	TSB	573	573	253	259	432	432	343	349	355	357	216	222	252	264	189	189	260	263	232	232	227	227
BTS125	TSB	567	600	253	259	368	380	343	349	347	351	222	222	252	256	189	189	242	245	250	250	227	227
BTS127	TSB	573	573	253	259	432	432	343	349	355	357	0	0	252	264	189	189	260	263	238	238	235	235
BIG95	IGB	573	573	253	259	432	432	343	349	357	357	216	222	252	264	189	189	260	263	238	238	235	235
BIG96	IGB	573	573	253	259	432	432	343	349	357	357	216	222	252	264	189	189	260	263	238	238	235	235
BIG97	IGB	573	573	253	259	432	432	343	349	357	357	216	222	252	264	189	189	260	263	238	238	235	235
BIG98	IGB	573	573	253	259	432	432	343	349	357	357	216	222	252	264	189	189	260	263	238	238	235	235
BIG99	IGB	573	573	253	259	432	432	343	349	357	357	216	222	252	264	189	189	260	263	238	238	235	235
BIG100	IGB	573	573	253	259	432	432	343	349	357	357	216	222	252	264	189	189	260	263	238	238	235	235
BIG101	IGB	573	573	253	259	432	432	0	0	357	357	216	222	252	264	189	189	260	263	238	238	235	235
BIG102	IGB	573	573	0	0	432	432	343	349	357	357	216	222	252	264	189	189	260	263	238	238	235	235
BIG103	IGB	573	573	253	259	432	432	343	349	357	357	216	222	252	264	189	189	260	263	238	238	235	235
BIG104	IGB	573	573	253	259	432	432	343	349	357	357	216	222	252	264	189	189	260	263	238	238	235	235
BIG105	IGB	573	573	253	259	432	432	343	349	357	357	216	222	252	264	189	189	260	263	238	238	235	235
BIG106	IGB	573	573	253	259	432	432	343	349	357	357	216	222	252	264	189	189	260	263	238	238	235	235
BIG107	IGB	573	573	253	259	432	432	343	349	357	357	216	222	252	264	189	189	260	263	238	238	235	235
BIG108	IGB	573	573	253	259	432	432	343	349	357	357	216	222	252	264	189	189	260	263	238	238	235	235
BIG109	IGB	573	573	253	259	432	432	343	349	357	357	216	222	252	264	189	189	260	263	238	238	235	235
BIG111	IGB	573	573	253	259	432	432	343	349	357	357	216	222	252	264	189	189	260	263	238	238	235	235
BIG112	IGB	573	573	253	259	432	432	343	349	357	357	216	222	252	264	189	189	260	263	238	238	235	235
BIG113	IGB	573	573	253	259	432	432	343	349	357	357	216	222	0	0	189	189	260	263	238	238	235	235
BIG114	IGB	573	573	253	259	432	432	343	349	357	357	216	222	252	264	189	189	260	263	238	238	235	235
BIG115	IGB	573	573	253	259	0	0	343	349	347	357	216	222	252	264	189	189	260	263	238	238	235	235
BIG116	IGB	573	573	253	259	432	432	343	349	357	357	216	222	252	264	189	189	260	263	238	238	235	235
BIG117	IGB	573	573	253	259	432	432	343	349	357	357	216	222	252	264	189	189	260	263	238	238	235	235
BIG118	IGB	567	573	253	259	380	440	343	349	347	347	213	222	252	256	186	189	260	263	238	238	227	227
BIG119	IGB	573	573	253	259	432	432	343	349	357	357	216	222	252	264	189	189	260	263	238	238	235	235
TSB= Todos os Santos Bay
IGB= Ilha Grande Bay

## Sheet: T_tagusensis
Species: Tubastraea tagusensis
Individual	Population	Microsatellite loci
		Tco1		Tco4		Tco5		Tco8		Tco9		Tco29		Tco30		Tco34		Tco37		Tco32		Tco32_b
		Allele 1	Allele 2	Allele 1	Allele 2	Allele 1	Allele 2	Allele 1	Allele 2	Allele 1	Allele 2	Allele 1	Allele 2	Allele 1	Allele 2	Allele 1	Allele 2	Allele 1	Allele 2	Allele 1	Allele 2	Allele 1	Allele 2
BTS73	TSB	573	573	253	253	380	424	343	349	347	347	213	225	252	256	213	219	245	248	240	246	270	276
BTS74	TSB	573	573	253	253	380	424	343	349	347	347	213	213	252	256	213	219	245	248	240	246	270	276
BTS75	TSB	573	573	253	253	380	424	343	349	347	347	213	213	252	256	213	219	245	248	240	246	270	276
BTS76	TSB	573	573	253	259	424	424	343	349	347	347	213	213	252	256	189	213	245	260	240	246	270	276
BTS77	TSB	573	573	253	259	424	424	343	349	347	347	213	213	252	256	189	213	245	260	240	246	270	276
BTS78	TSB	567	573	253	259	424	424	343	349	347	351	222	222	252	256	189	213	0	0	240	246	270	276
BTS79	TSB	573	573	253	253	380	424	343	349	347	347	213	213	252	256	213	219	245	248	240	246	270	276
BTS81	TSB	573	573	253	253	380	424	343	349	347	347	213	213	252	256	213	219	245	248	240	246	270	276
BTS82	TSB	573	573	253	253	380	424	343	349	347	347	213	213	252	256	189	213	245	260	240	246	270	276
BTS83	TSB	573	573	253	259	424	424	343	349	347	347	213	213	252	256	189	213	245	260	240	246	270	276
BTS84	TSB	573	573	253	259	424	424	343	349	347	347	213	213	252	256	189	213	245	260	240	246	270	276
BTS85	TSB	573	573	253	259	424	424	343	349	347	347	213	213	252	256	189	213	245	260	240	246	270	276
BTS86	TSB	573	573	253	253	380	424	343	349	347	347	213	213	252	256	213	219	245	248	240	246	270	276
BTS87	TSB	573	573	253	253	380	424	343	349	347	347	213	213	252	256	213	219	245	248	240	246	270	276
BTS88	TSB	573	573	253	253	380	424	343	349	347	347	213	213	252	256	213	219	245	248	240	246	270	276
BTS89	TSB	573	573	253	253	380	424	343	349	347	347	213	213	252	256	213	219	245	248	240	246	270	276
BTS90	TSB	573	573	253	253	380	424	343	349	347	347	213	213	252	256	213	219	245	248	240	246	270	276
BTS91	TSB	573	573	253	253	380	424	343	349	347	347	213	213	0	0	189	189	245	248	240	246	270	276
BTS92	TSB	573	573	253	253	380	424	343	349	347	347	213	213	252	256	213	219	245	248	240	246	270	276
BTS93	TSB	573	573	253	253	380	424	343	349	347	347	213	213	252	256	213	219	245	248	240	246	270	276
BTS94	TSB	573	573	253	253	380	424	343	349	347	347	213	213	252	256	213	219	245	248	240	246	270	276
BTS95	TSB	573	573	253	253	380	424	343	349	347	347	213	213	252	256	213	219	245	248	240	246	270	276
BTS96	TSB	573	573	253	259	424	424	343	349	347	347	213	213	252	256	189	189	245	260	240	246	270	276
BTS97	TSB	573	573	253	259	424	424	343	349	347	347	213	213	252	256	189	189	245	260	240	246	270	276
BIG65	IGB	573	573	253	253	380	424	343	349	347	347	213	213	252	256	213	219	245	248	240	246	270	276
BIG66	IGB	573	573	253	253	380	424	343	349	347	347	213	213	252	256	213	219	245	248	240	246	270	276
BIG67	IGB	573	573	253	253	380	424	343	349	347	347	213	213	252	256	213	219	245	248	240	246	273	276
BIG68	IGB	573	573	253	253	380	424	343	349	347	347	213	213	252	256	213	219	242	245	240	246	270	276
BIG69	IGB	573	573	253	253	380	424	343	349	347	347	213	213	252	256	213	219	242	245	240	246	270	276
BIG70	IGB	573	573	253	253	380	424	343	349	347	347	213	213	252	256	213	219	245	248	240	246	270	276
BIG71	IGB	573	573	253	253	380	424	343	349	347	347	213	225	252	256	213	219	245	248	240	246	270	276
BIG72	IGB	573	573	253	253	380	424	343	349	347	347	213	213	252	256	213	219	245	248	240	246	270	276
BIG73	IGB	573	573	253	253	380	424	343	349	347	347	213	213	252	256	213	219	245	248	240	246	270	276
BIG74	IGB	573	573	253	253	380	424	343	349	347	347	213	213	252	256	213	219	245	248	240	246	270	276
BIG75	IGB	573	573	253	259	424	424	343	349	347	347	213	213	252	256	189	213	245	260	240	246	270	276
BIG76	IGB	573	573	253	253	380	424	343	349	347	347	213	213	252	256	213	219	245	248	240	246	270	276
BIG77	IGB	573	573	253	253	380	424	343	349	347	347	213	213	252	256	213	219	245	248	240	246	270	276
BIG78	IGB	573	573	253	253	380	424	343	349	347	347	213	213	252	256	213	219	242	245	240	246	270	276
BIG79	IGB	573	573	253	253	380	424	343	349	347	347	213	213	252	256	213	219	245	248	240	246	270	276
BIG80	IGB	573	573	253	253	380	424	343	349	347	347	213	213	252	256	213	219	245	248	240	246	270	276
BIG81	IGB	573	573	253	253	380	424	343	349	347	347	213	213	252	256	213	219	242	245	240	246	270	276
BIG82	IGB	573	573	253	253	380	424	343	349	347	347	213	213	252	256	213	219	242	245	240	246	270	276
BIG83	IGB	573	573	253	253	380	424	343	349	347	347	213	213	252	256	213	219	242	245	240	246	270	276
BIG84	IGB	573	573	253	253	380	424	343	349	347	347	213	213	252	256	213	219	245	248	240	246	270	276
BIG85	IGB	573	573	253	253	380	424	343	349	347	347	213	213	252	256	213	219	242	245	240	246	270	276
BIG86	IGB	573	573	253	253	380	424	343	349	347	347	213	213	252	256	213	219	245	248	246	246	270	276
BIG87	IGB	573	573	253	253	380	424	343	349	347	347	213	213	252	256	213	219	245	248	240	246	270	276
BIG88	IGB	573	573	253	253	380	424	343	349	347	347	213	225	252	256	213	219	245	248	240	246	270	276
TSB= Todos os Santos Bay
IGB= Ilha Grande Bay
